# Supplementary material
Source: PubMed Central journal article supplement (PMC7045327)
Supplement: EBM892601_Supplemental_Material.pdf [file EBM892601_Supplemental_Material.pdf]

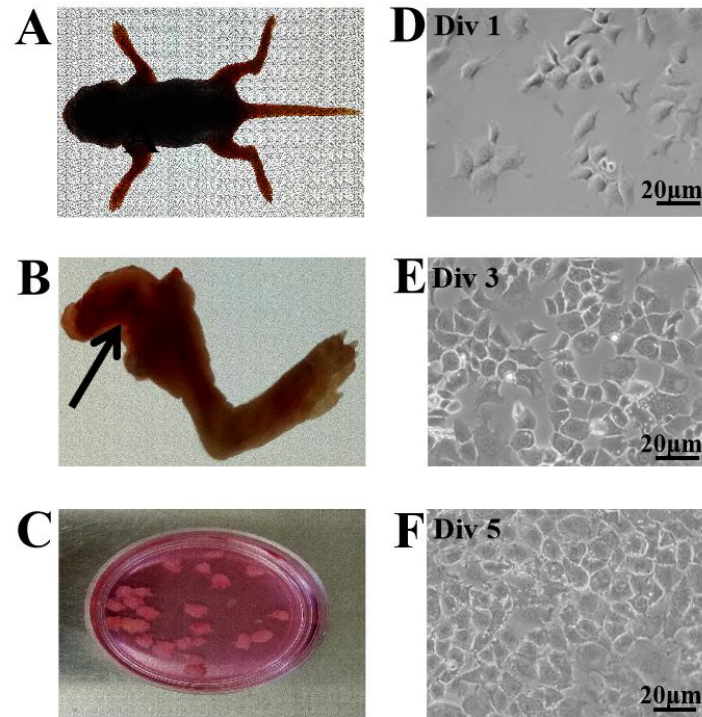

**Figure S1** Extraction schematic of mouse cartilage (A-C) and chondrocyte culture (D-F), Div: Days in vitro.

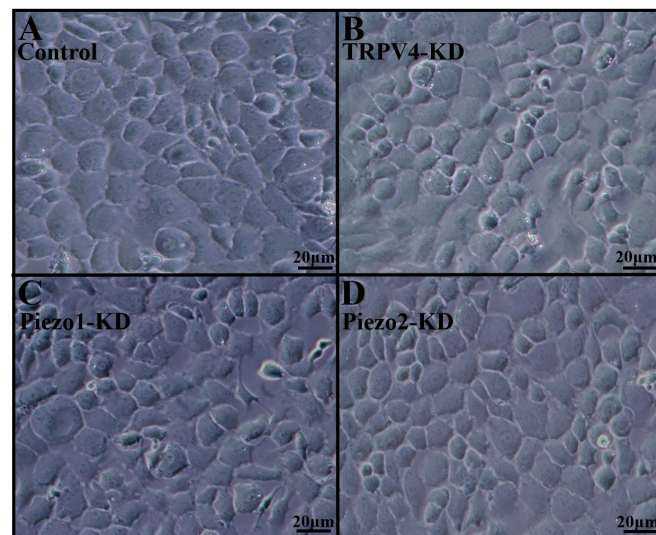

**Figure S2** The cell morphology of (A) Control, (B) TRPV4-KD, (C) Piezo1-KD, or (D) Piezo2-KD cells which plated on 6-well BioFlex<sup>®</sup> plates, respectively.

**Table S1.** Average properties of  $[Ca^{2+}]_i$  oscillation for Control, TRPV4-KD, Piezo1-KD, and Piezo2-KD cells (mean±standard deviation).

|                                          | Control<br>(n=42) | TRPV4-KD<br>(n=44) | Piezo1-KD<br>(n=47) | Piezo2-KD<br>(n=39) |
|------------------------------------------|-------------------|--------------------|---------------------|---------------------|
| Cellular $Ca^{2+}$ response<br>rates (%) | 18.76±1.22        | 16.31±1.45         | 15.99±1.53          | 17.11±1.66          |
| Oscillation amplitude                    | 3.66±0.34         | 3.28±0.21          | 3.07±0.19 ↓         | 3.34±0.25           |
| Oscillation frequency<br>(Peaks/min)     | 0.17±0.01         | 0.18±0.01          | 0.16±0.01           | 0.17±0.01           |

Data were pooled from  $n=42$  cells,  $n=44$  cells,  $n=47$  cells, and  $n=39$  cells for Control, TRPV4-KD, Piezo1-KD, and Piezo2-KD, respectively. Data are represented as the mean±standard deviation of three independent experiments.
